# Supplementary material for: Multifunctional cellulose esters by olefin cross-metathesis and thiol-Michael addition
Source: Royal Society of Chemistry journal article supplement (doi:10.1039/c6py00539j), 2016-01-01
Supplement: c6py00539j1.pdf [file c6py00539j1.pdf]

## Multifunctional cellulose esters by olefin cross-metathesis and thiol-Michael addition

### Supporting Information

Xiangtao Meng,<sup>1,2</sup> Shreya R. Choudhury,<sup>3</sup> Kevin J. Edgar<sup>\*1,2</sup>

<sup>1</sup>Macromolecules and Interfaces Institute, Virginia Tech, Blacksburg, VA 24061, USA.

<sup>2</sup>Department of Sustainable Biomaterials, Virginia Tech, Blacksburg, VA 24061, USA.

<sup>3</sup>Department of Chemistry, Virginia Tech, Blacksburg, VA 24061, USA.

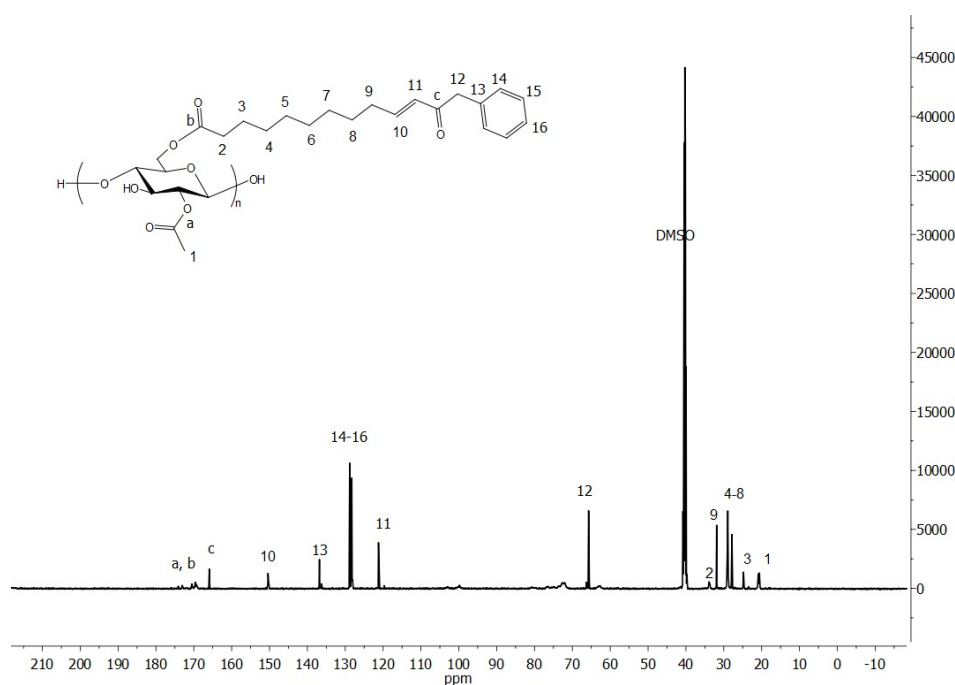

S1. Carbon NMR spectrum of polymer 1 CA-Un067-BA.

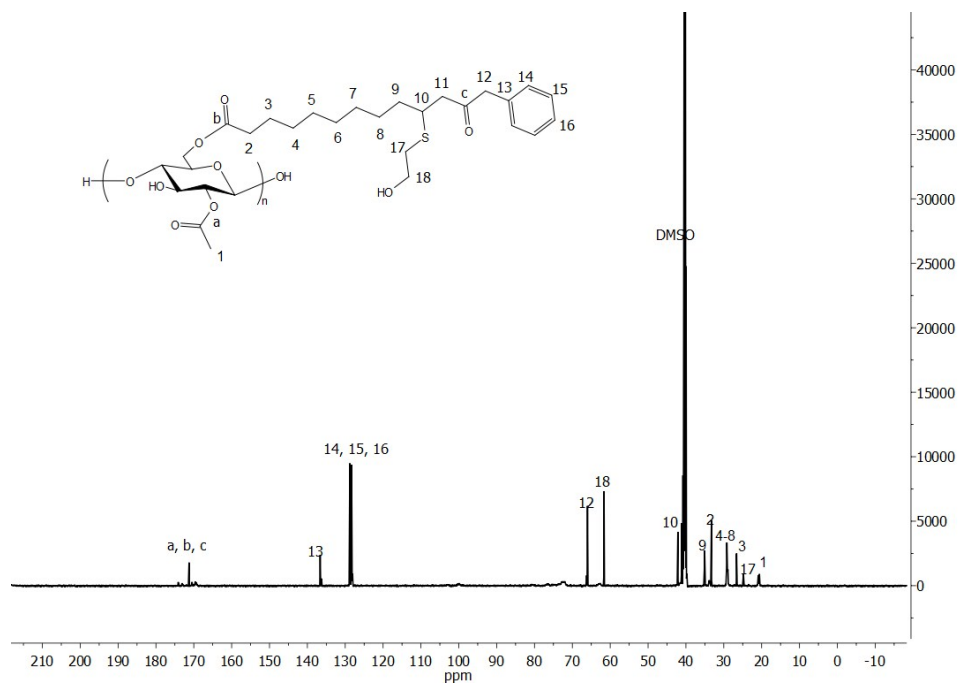

S2. Carbon NMR spectrum of polymer 7 CA-Un067-BA-ME

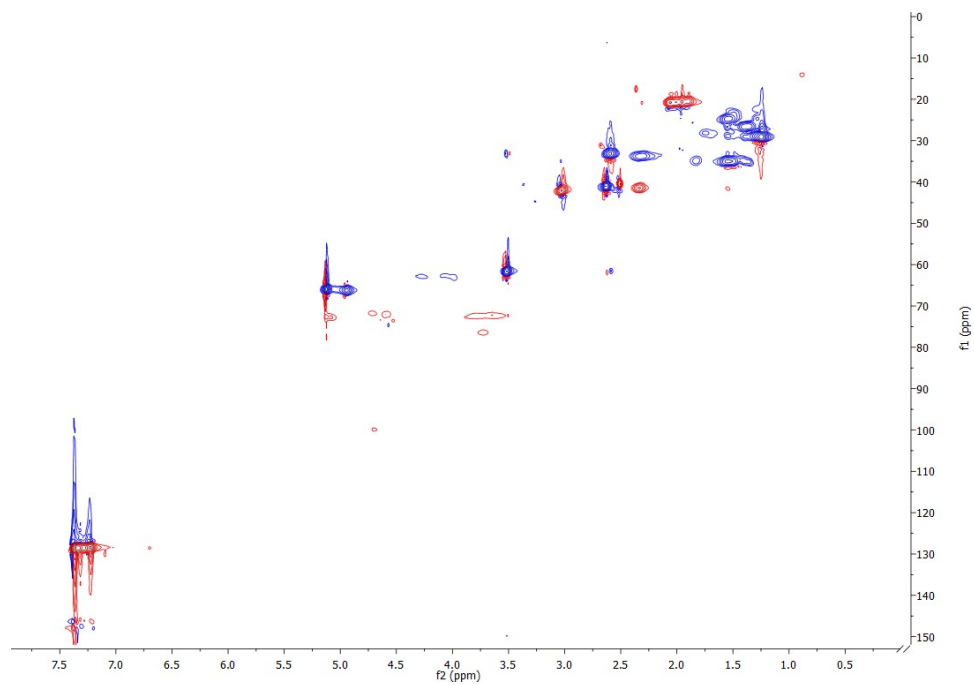

S3. 1H-13C HSQC spectrum of polymer 7 CA-Un067-BA-ME.

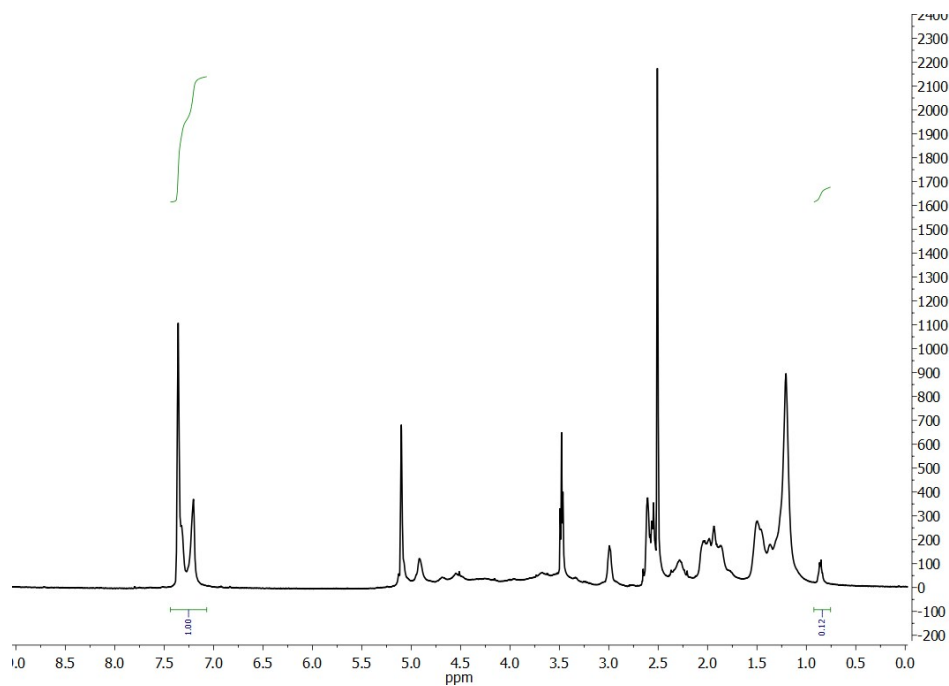

S4. Proton NMR spectrum of CA-Un067-BA-ME catalyzed by high amount of hexylamine (olefin/2-ME/HA ratio = 1/6/6).

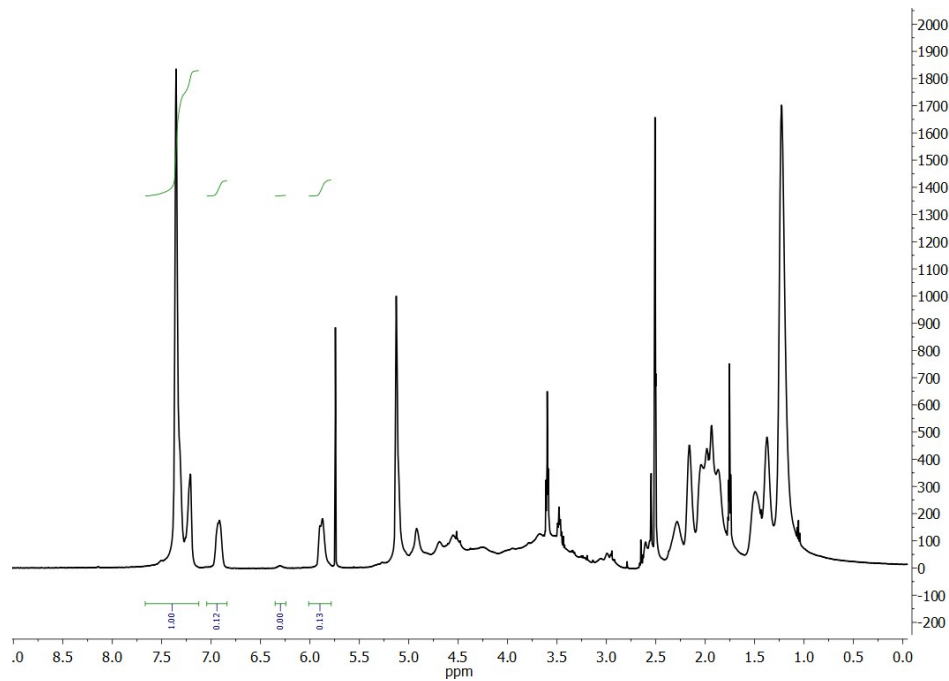

S5. Proton NMR of polymer 6 CA-Un067-BA-ME catalyzed by TEA. Calculated from integrations of NMR peaks, the conversion of the reaction is 35%.

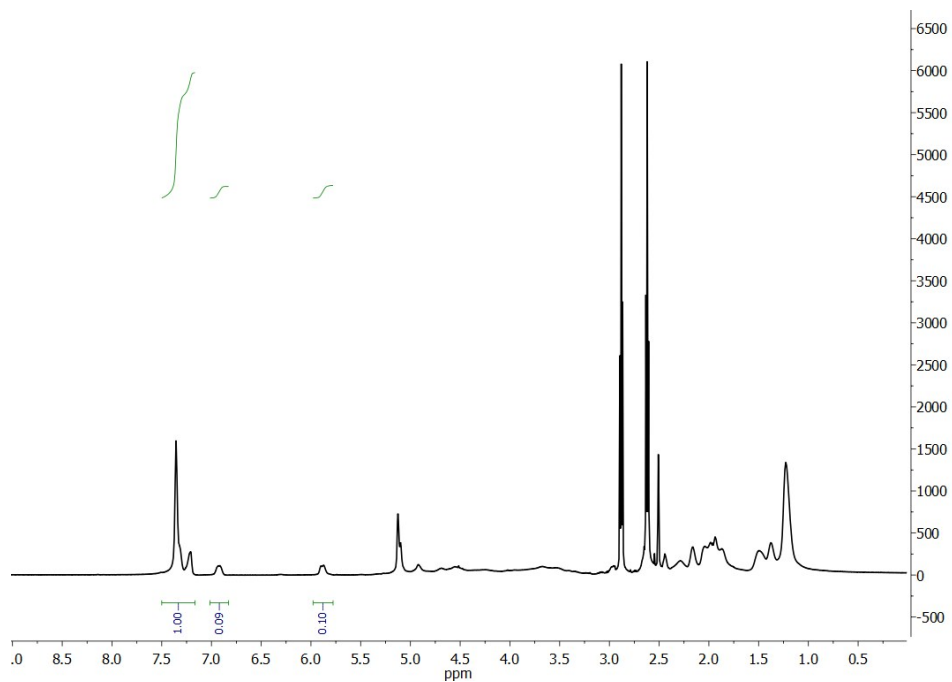

S6. Proton NMR spectrum of polymer 8 CA-Un067-BA-3MPA catalyzed by TEA. Calculated from integrations of NMR peaks, the conversion of the reaction is 50%.

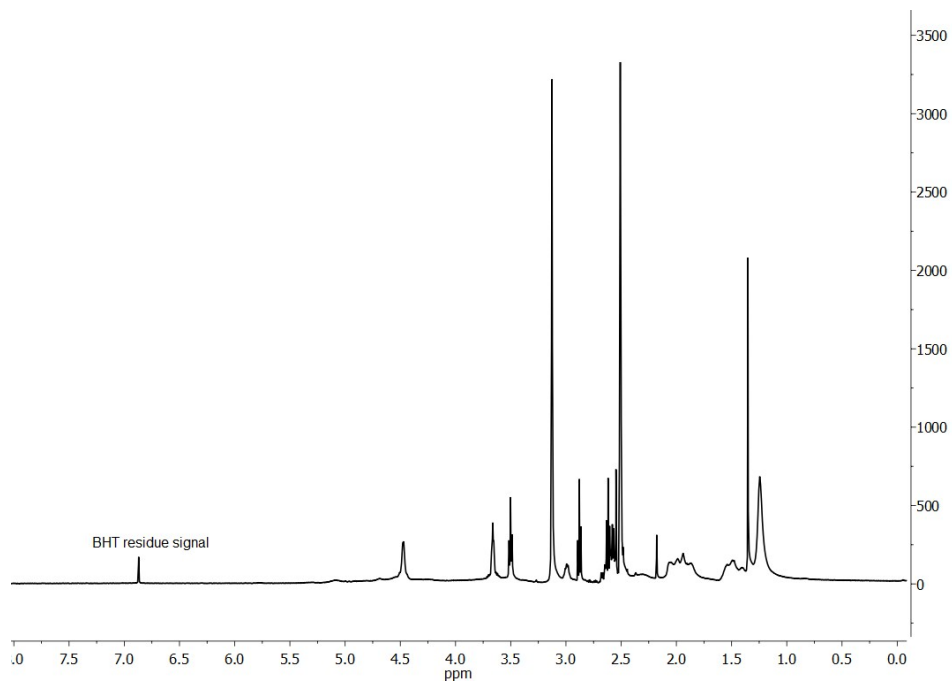

S7. Proton NMR spectrum of polymer 12 CA-Un067-TMA-2ME.

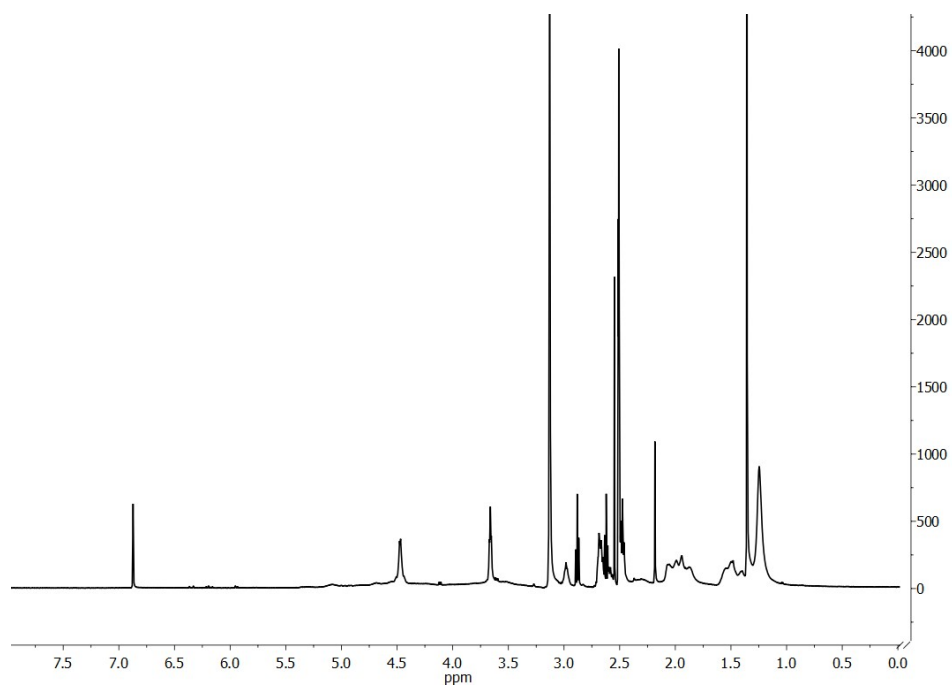

S8. Proton NMR spectrum of polymer 13 CA-Un067-TMA-3MPA.

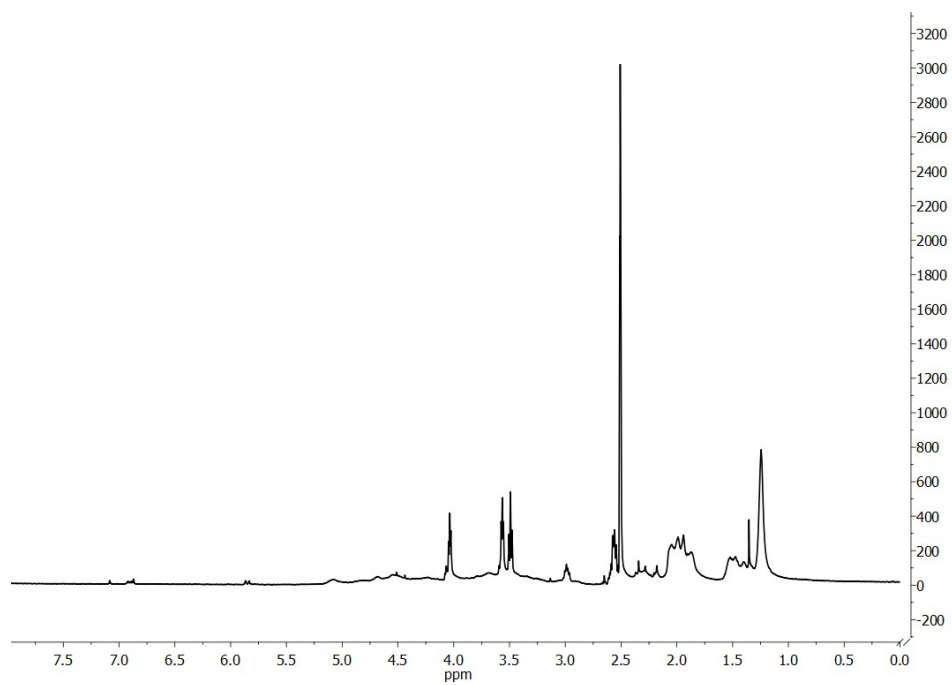

S9. Proton NMR spectrum of polymer 14 CA-Un067-HEA-2ME using TEA as catalyst.

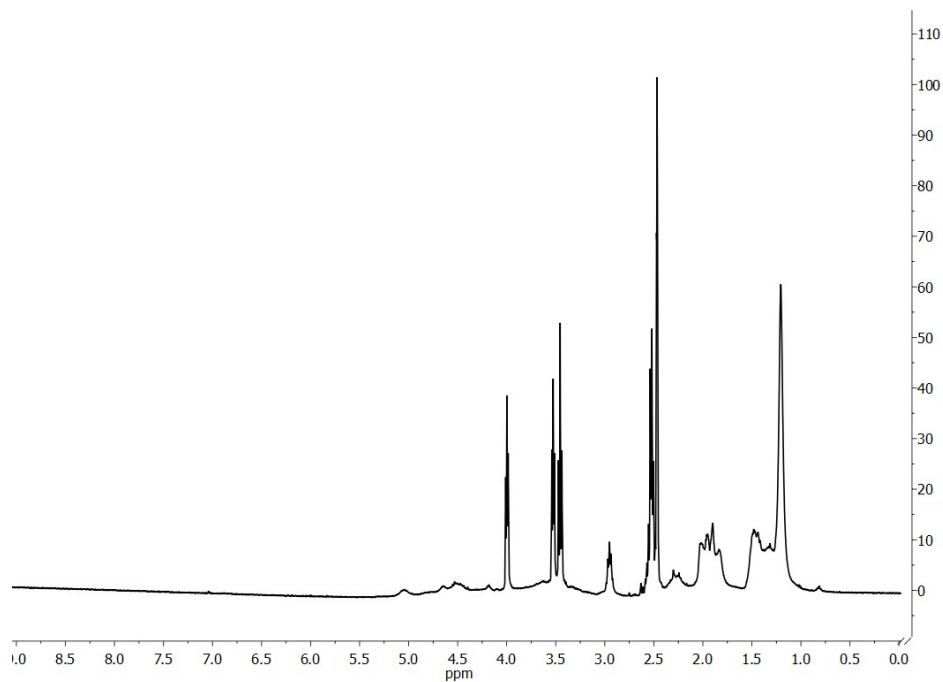

S10. Proton NMR spectrum of polymer 15 CA-Un067-HEA-2ME using HA as catalyst.

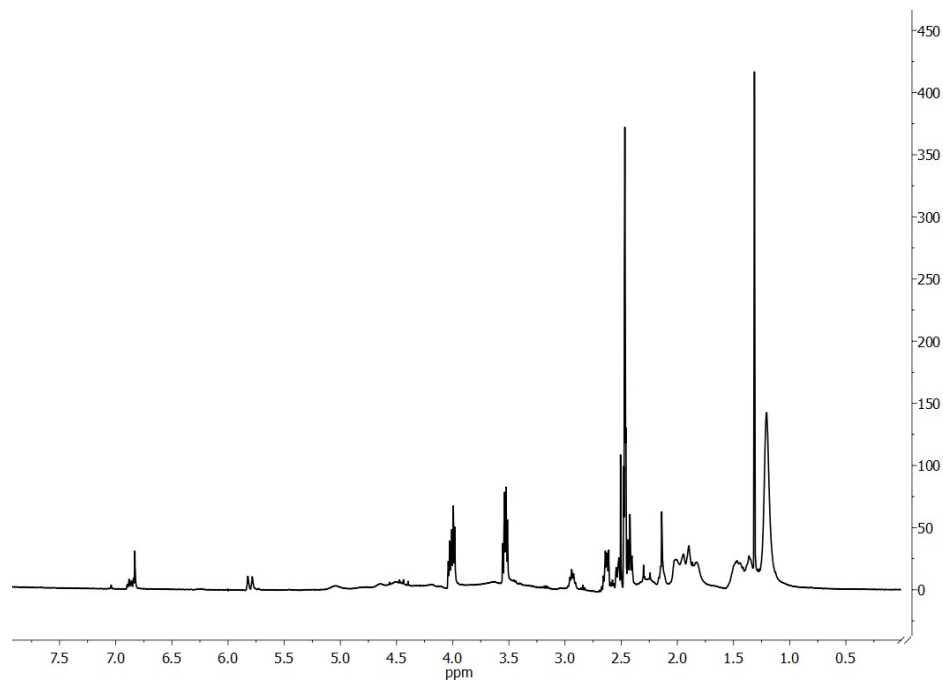

S11. Proton NMR spectrum of polymer 16 CA-Un067-HEA-3MPA using TEA as catalyst.

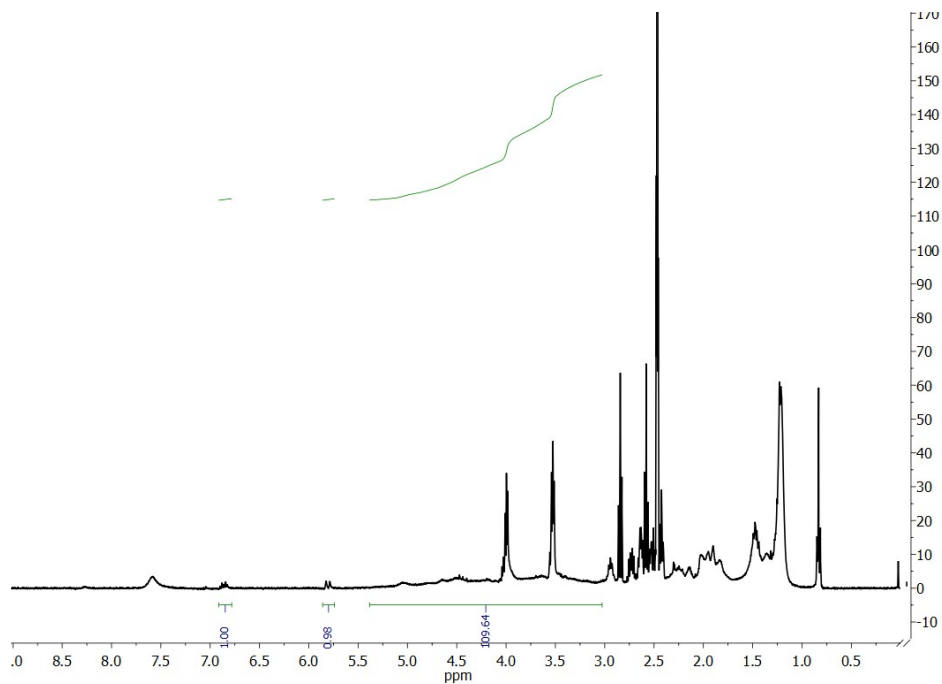

S12. Proton NMR spectrum of polymer 17 CA-Un067-HEA-3MPA using HA as catalyst.

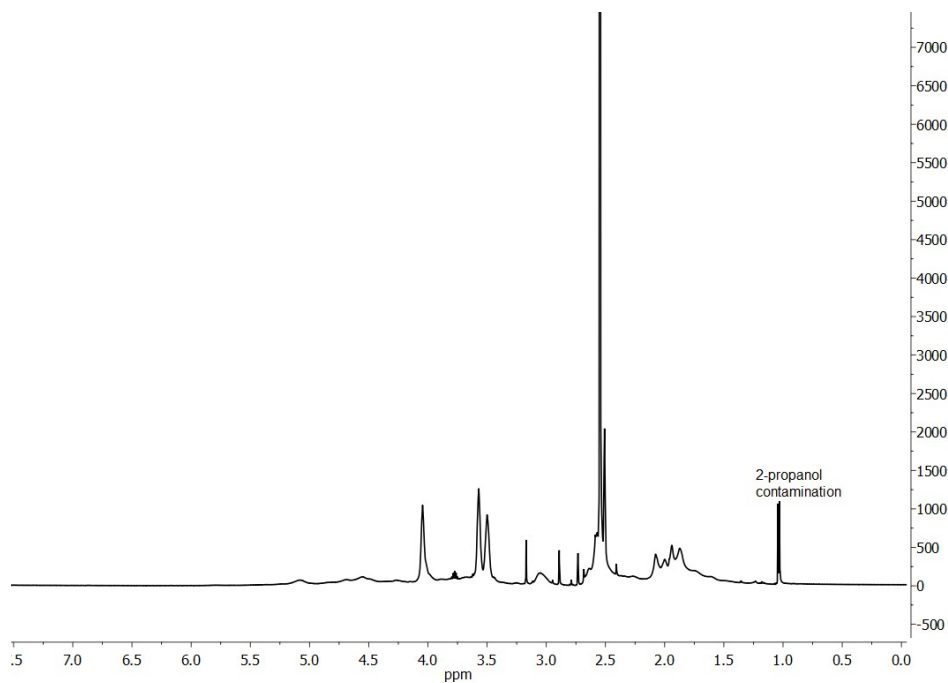

S13. Proton NMR spectrum of polymer 18 CA-Pen079-HEA-2ME using TEA as catalyst.

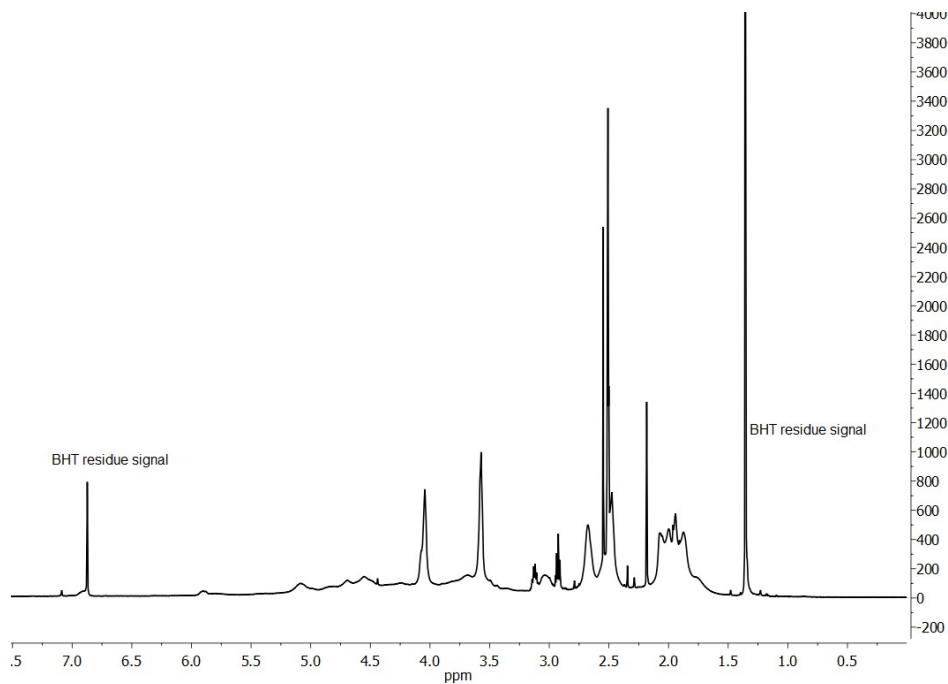

S14. Proton NMR spectrum of polymer 19 CA-Pen079-HEA-3MPA using TEA as catalyst.

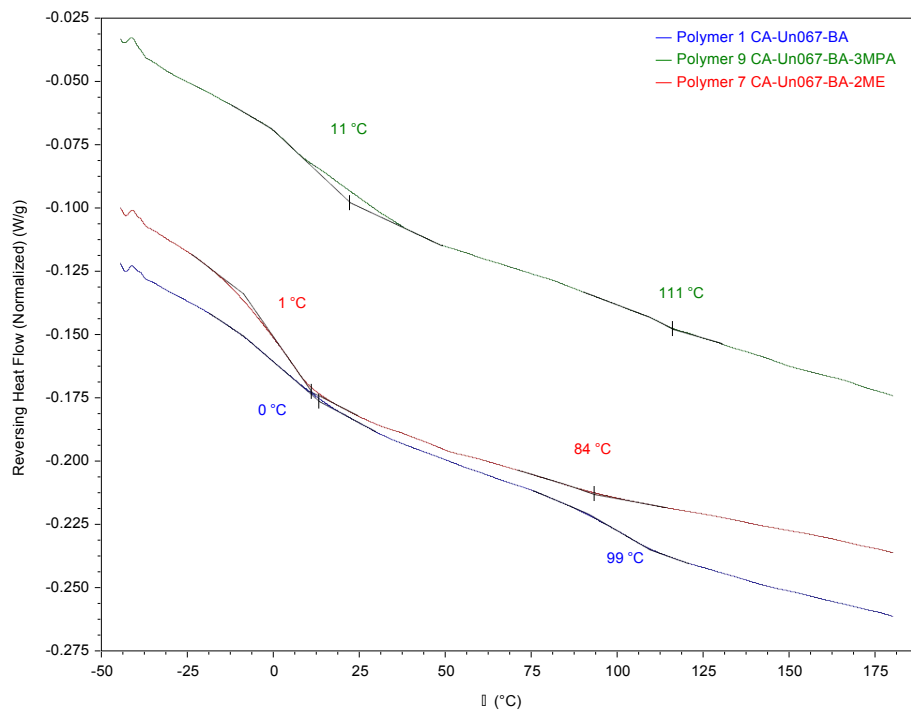

S15. DSC traces of polymers 1, 7 and 9.



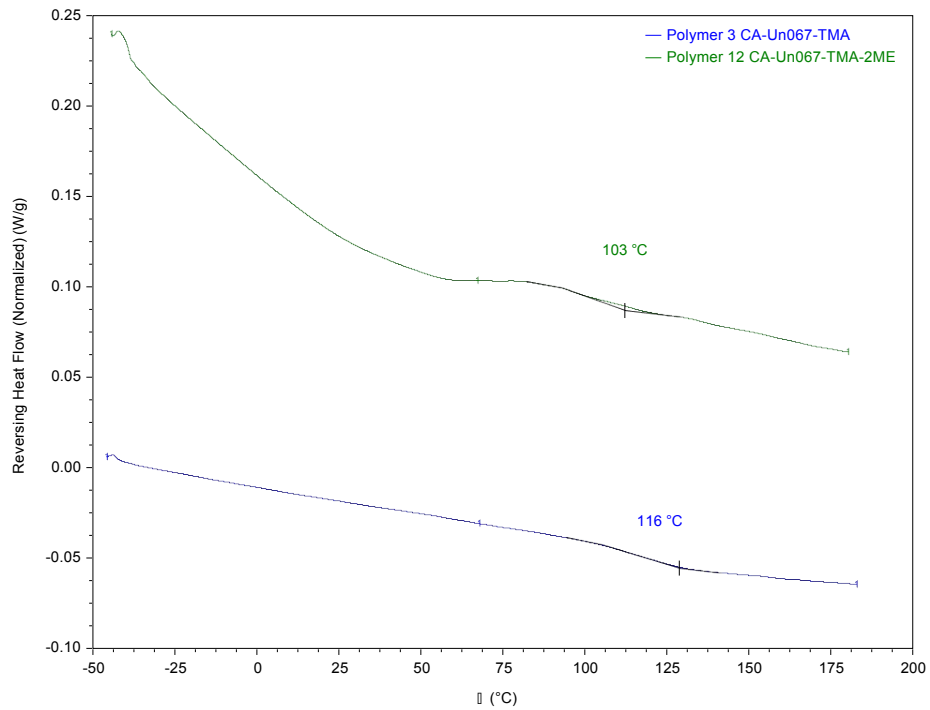

S16. DSC traces of polymers 3 and 12.

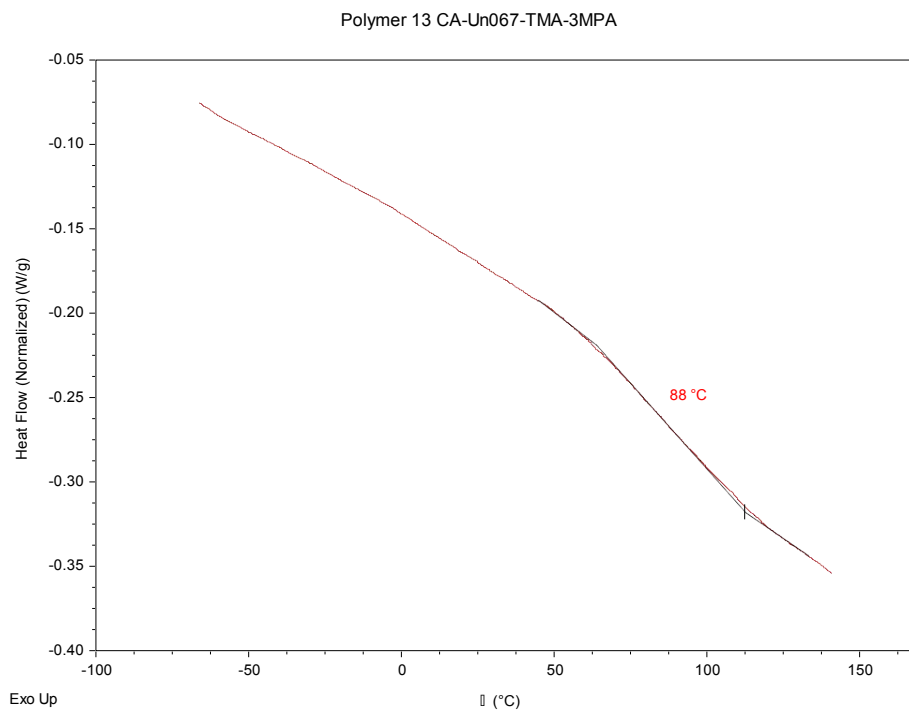

S17. DSC trace of polymer 13.

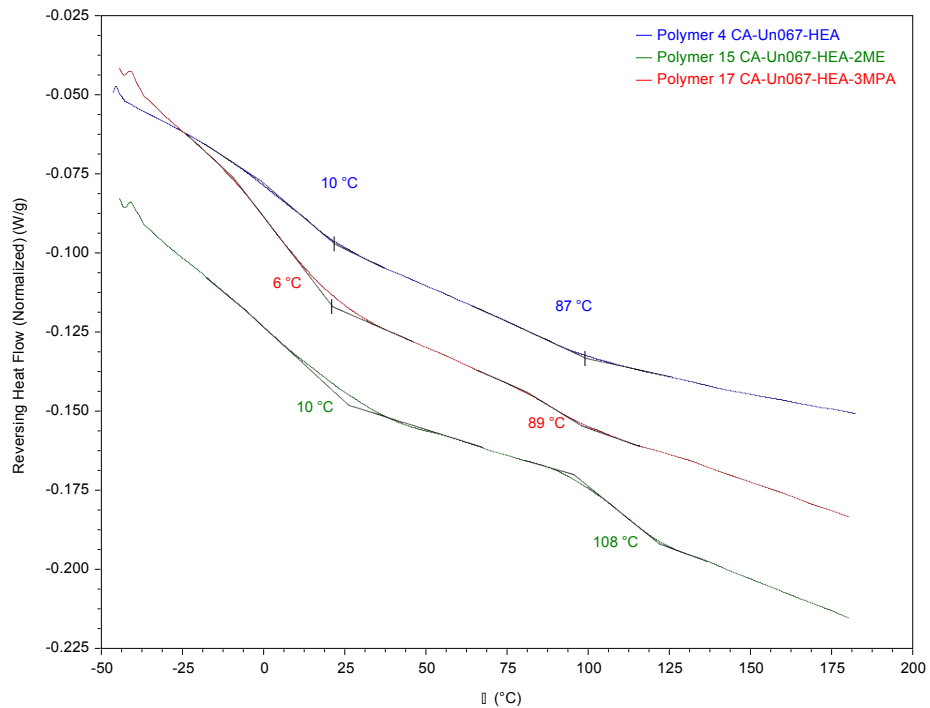

S18. DSC traces of polymers 4, 15 and 17.

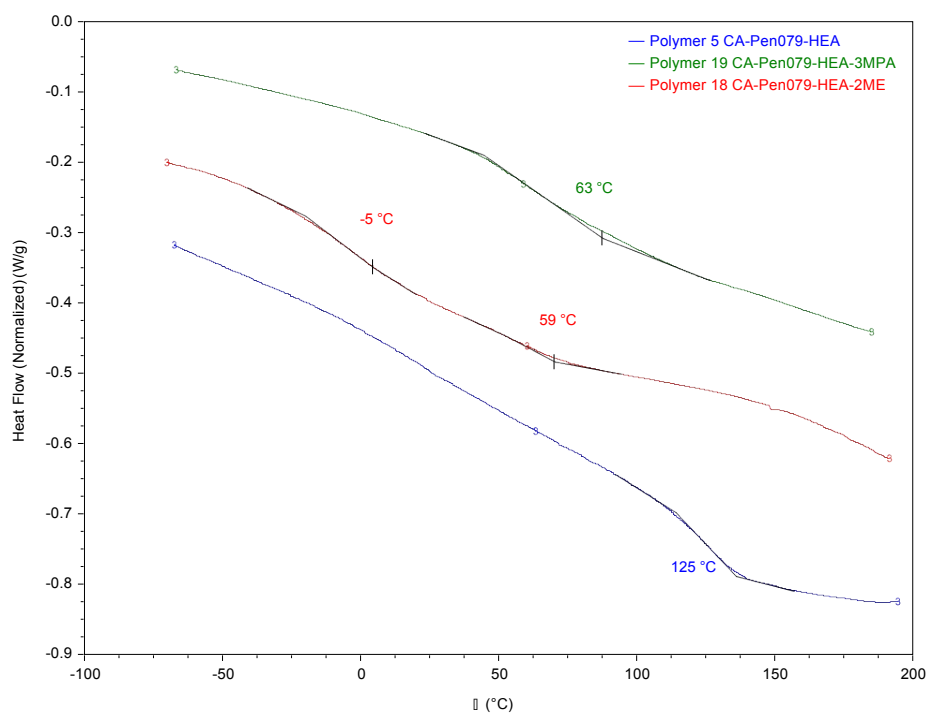

S19. DSC traces of polymers 5, 18 and 19.
